# Supplementary material
Source: publisher site journal article supplement (https://cdn.jamanetwork.com/ama/content_public/journal/derm/927493/dld130021supp1_prod.pdf)
Supplement: Supplementary file 1 [file dld130021supp1_prod.pdf]

## Supplementary Online Content

Silverberg JI, Silverberg NB. Association between vitiligo and atopic disorders: a pilot study. *JAMA Dermatol*. Published online June 5, 2013.  
doi:10.1001/jamadermatol.2013.4228

eTable. Questions used in the study

This supplementary material has been provided by the authors to give readers additional information about their work.

**eTable. Questions used in the study**

| <b>Questions</b>                                                                                                                                                                                                                                                     | <b>Response (%)</b> |
|----------------------------------------------------------------------------------------------------------------------------------------------------------------------------------------------------------------------------------------------------------------------|---------------------|
| <b>Adult survey</b>                                                                                                                                                                                                                                                  |                     |
| What is your sex? (male/female)                                                                                                                                                                                                                                      | 99.5                |
| What is your age in years? (numeric)                                                                                                                                                                                                                                 | 99.9                |
| Have you ever been diagnosed with vitiligo by a doctor? (yes/no)                                                                                                                                                                                                     | 99.9                |
| Does the vitiligo affect both sides of the body? (yes/no)                                                                                                                                                                                                            | 98.2                |
| How much body surface area does the vitiligo affect? (1-25%, 26-50%, 51-75%, 75-99%, 100%)                                                                                                                                                                           | 98.7                |
| How old were you when your vitiligo started? (numeric)                                                                                                                                                                                                               | 98.0                |
| How long did/do you have vitiligo? (numeric)                                                                                                                                                                                                                         | 97.8                |
| On which parts of the body is your vitiligo located? (yes/no)<br>scalp, grey hair, eyelids, lips, in the mouth, chest, stomach, back, underarms, arms, elbows, wrists, hands, fingers, hips, genitals, buttocks, legs, knees, ankles, feet, toes, face, neck         | 87.1                |
| Over the last week, how itchy, sore, painful or stinging has your skin been?                                                                                                                                                                                         | 93.5                |
| Do you have or have you ever had (yes/no):<br>asthma, eczema or atopic dermatitis, food allergies or seasonal allergies                                                                                                                                              | 93.3–96.0           |
| <b>Pediatric survey</b>                                                                                                                                                                                                                                              |                     |
| What is your child's sex? (male/female)                                                                                                                                                                                                                              | 99.1                |
| What is your child's age in years? (numeric)                                                                                                                                                                                                                         | 100.0               |
| Has your child ever been diagnosed with vitiligo by a doctor? (yes/no)                                                                                                                                                                                               | 98.0                |
| Does the vitiligo affect both sides of the body? (yes/no)                                                                                                                                                                                                            | 99.2                |
| How much body surface area does the vitiligo affect? (1-25%, 26-50%, 51-75%, 75-99%, 100%)                                                                                                                                                                           | 99.1                |
| How old was your child when their vitiligo started? (numeric)                                                                                                                                                                                                        | 98.0                |
| How long has your child had vitiligo? (numeric)                                                                                                                                                                                                                      | 98.0                |
| On which parts of the body is your child's vitiligo located? (yes/no)<br>scalp, grey hair, eyelids, lips, in the mouth, chest, stomach, back, underarms, arms, elbows, wrists, hands, fingers, hips, genitals, buttocks, legs, knees, ankles, feet, toes, face, neck | 96.1                |
| Over the last week, how itchy, sore, painful or stinging has your child's skin been?                                                                                                                                                                                 | 80.7                |
| Does your child have or have they ever had (yes/no):<br>asthma, eczema or atopic dermatitis, food allergies or seasonal allergies                                                                                                                                    | 96.8–97.1           |
